# Supplementary material for: Five ixodid tick species including two morphotypes of Rhipicephalus turanicus on nestlings of Eurasian eagle owl (Bubo bubo) from south-eastern Bulgaria
Source: Parasit Vectors. 2021 Jun 26;14:334. doi: 10.1186/s13071-021-04832-0 (PMC8235848; doi:10.1186/s13071-021-04832-0)
Supplement: Supplementary file 1 — Additional file 1: Table S1. Estimates of evolutionary divergence between sequences using the number of base differences per site. The analysis involved 40 nucleotide sequences, with codon positions including 1st + 2nd + 3rd + noncoding. All positions containing gaps and missing data were eliminated, with a total of 421 positions in the final dataset. [file 13071_2021_4832_MOESM1_ESM.xls]

## Sheet: MatrixOutput
	Table S1. Estimates of Evolutionary Divergence between Sequences using the number of base differences per site. The analysis involved 40 nucleotide sequences, with codon positions included 1st+2nd+3rd+Noncoding. All positions containing gaps and missing data were eliminated, with a total of 421 positions in the final dataset.
	Sample ID	1	2	3	4	5	6	7	8	9	10	11	12	13	14	15	16	17	18	19	20	21	22	23	24	25	26	27	28	29	30	31	32	33	34	35	36	37	38	39
1	Rhipicephalus_bursa_(Iran)_KM494913
2	Rhipicephalus_rossicus_(Romania)_JX394215	0.135392
3	Rhipicephalus_sanguineus_(Portugal)_KU556745	0.125891	0.106888
4	Rhipicephalus_sanguineus_(USA_Oklahoma)_AF081829	0.137767	0.106888	0.0522565
5	Rhipicephalus_turanicus_(Albania_Gjirokaster)_KY606303	0.140143	0.12114	0.106888	0.102138
6	Rhipicephalus_turanicus_(Bulgaria)_Bubo-1_(MK038880)	0.137767	0.118765	0.11639	0.106888	0.0142518
7	Rhipicephalus_turanicus_(Bulgaria)_Bubo-10_(105154-n1)	0.140143	0.118765	0.11639	0.106888	0.0118765	0.00712589
8	Rhipicephalus_turanicus_(Bulgaria)_Bubo-11_(105154-n2)	0.137767	0.11639	0.118765	0.109264	0.0142518	0.00475059	0.0023753
9	Rhipicephalus_turanicus_(Bulgaria)_Bubo-12_(105154-n5)	0.140143	0.114014	0.11639	0.106888	0.0166271	0.0118765	0.00950119	0.00712589
10	Rhipicephalus_turanicus_(Bulgaria)_Bubo-13_(105304-k2)	0.137767	0.114014	0.118765	0.109264	0.0118765	0.00712589	0.00475059	0.0023753	0.00950119
11	Rhipicephalus_turanicus_(Bulgaria)_Bubo-14_(105304-n1)	0.140143	0.111639	0.11639	0.106888	0.0142518	0.0190024	0.0166271	0.0142518	0.00712589	0.0118765
12	Rhipicephalus_turanicus_(Bulgaria)_Bubo-15_(105304-n2)	0.135392	0.114014	0.118765	0.109264	0.0166271	0.00712589	0.00475059	0.0023753	0.00950119	0.00475059	0.0166271
13	Rhipicephalus_turanicus_(Bulgaria)_Bubo-16_(105304-n3)	0.137767	0.114014	0.114014	0.104513	0.0213777	0.0166271	0.0142518	0.0118765	0.00475059	0.0142518	0.0118765	0.0142518
14	Rhipicephalus_turanicus_(Bulgaria)_Bubo-17_(105304-n4)	0.144893	0.114014	0.118765	0.106888	0.0213777	0.0166271	0.0142518	0.0118765	0.00475059	0.0142518	0.0118765	0.0142518	0.00950119
15	Rhipicephalus_turanicus_(Bulgaria)_Bubo-18_(105304-n5)	0.135392	0.111639	0.114014	0.104513	0.0190024	0.00950119	0.00712589	0.00475059	0.0118765	0.00712589	0.0190024	0.00712589	0.0166271	0.0166271
16	Rhipicephalus_turanicus_(Bulgaria)_Bubo-2_(MK038881)	0.137767	0.114014	0.114014	0.111639	0.023753	0.0190024	0.0166271	0.0142518	0.00712589	0.0166271	0.0142518	0.0166271	0.0118765	0.0118765	0.0190024
17	Rhipicephalus_turanicus_(Bulgaria)_Bubo-3_(MK038882)_6x	0.137767	0.11639	0.118765	0.109264	0.0142518	0.00475059	0.0023753	0	0.00712589	0.0023753	0.0142518	0.0023753	0.0118765	0.0118765	0.00475059	0.0142518
18	Rhipicephalus_turanicus_(Bulgaria)_Bubo-4_(MK038883)	0.137767	0.111639	0.114014	0.104513	0.0190024	0.0142518	0.0118765	0.00950119	0.0023753	0.0118765	0.00950119	0.0118765	0.0023753	0.00712589	0.0142518	0.00950119	0.00950119
19	Rhipicephalus_turanicus_(Bulgaria)_Bubo-5_(MK038884)_2x	0.135392	0.111639	0.114014	0.104513	0.0190024	0.00950119	0.00712589	0.00475059	0.0118765	0.00712589	0.0190024	0.00712589	0.0166271	0.0166271	0.00475059	0.0190024	0.00475059	0.0142518
20	Rhipicephalus_turanicus_(Bulgaria)_Bubo-6_(105154-k2)	0.137767	0.111639	0.114014	0.104513	0.0142518	0.0142518	0.0118765	0.00950119	0.0023753	0.0118765	0.00475059	0.0118765	0.00712589	0.00712589	0.0142518	0.00950119	0.00950119	0.00475059	0.0142518
21	Rhipicephalus_turanicus_(Bulgaria)_Bubo-7_(105154-k3)	0.133017	0.114014	0.111639	0.102138	0.0142518	0.00950119	0.0118765	0.00950119	0.0166271	0.0118765	0.0190024	0.0118765	0.0213777	0.0213777	0.0142518	0.0213777	0.00950119	0.0190024	0.0142518	0.0142518
22	Rhipicephalus_turanicus_(Bulgaria)_Bubo-8_(105154-k4)	0.140143	0.114014	0.11639	0.106888	0.0213777	0.0166271	0.0142518	0.0118765	0.00475059	0.0142518	0.0118765	0.0142518	0.00475059	0.00950119	0.0166271	0.0118765	0.0118765	0.0023753	0.0166271	0.00712589	0.0213777
23	Rhipicephalus_turanicus_(Bulgaria)_Bubo-9_(105154-k5)	0.135392	0.111639	0.114014	0.104513	0.0190024	0.00950119	0.00712589	0.00475059	0.0118765	0.00712589	0.0190024	0.00712589	0.0166271	0.0166271	0.00475059	0.0190024	0.00475059	0.0142518	0	0.0142518	0.0142518	0.0166271
24	Rhipicephalus_turanicus_(China_Pishan)_KY606293	0.135392	0.0926366	0.111639	0.104513	0.0855107	0.0902613	0.0902613	0.0926366	0.0902613	0.0902613	0.087886	0.0902613	0.0902613	0.0902613	0.087886	0.0973872	0.0926366	0.087886	0.087886	0.087886	0.0926366	0.0902613	0.087886
25	Rhipicephalus_turanicus_(China_Tumushuke)_KY606294	0.135392	0.0926366	0.111639	0.104513	0.0855107	0.0902613	0.0902613	0.0926366	0.0902613	0.0902613	0.087886	0.0902613	0.0902613	0.0902613	0.087886	0.0973872	0.0926366	0.087886	0.087886	0.087886	0.0926366	0.0902613	0.087886	0
26	Rhipicephalus_turanicus_(China_Xinjiang)_KU880590	0.133017	0.0902613	0.109264	0.102138	0.087886	0.0926366	0.0926366	0.0950119	0.0926366	0.0926366	0.0902613	0.0926366	0.0926366	0.0926366	0.0902613	0.0997625	0.0950119	0.0902613	0.0902613	0.0902613	0.0902613	0.0926366	0.0902613	0.0023753	0.0023753
27	Rhipicephalus_turanicus_(China_Yecheng)_KY606296	0.135392	0.0926366	0.111639	0.104513	0.0855107	0.0902613	0.0902613	0.0926366	0.0902613	0.0902613	0.087886	0.0902613	0.0902613	0.0902613	0.087886	0.0973872	0.0926366	0.087886	0.087886	0.087886	0.0926366	0.0902613	0.087886	0	0	0.0023753
28	Rhipicephalus_turanicus_(Croatia_Hvar)_KX757886	0.144893	0.114014	0.118765	0.106888	0.023753	0.0190024	0.0166271	0.0142518	0.00712589	0.0166271	0.0142518	0.0166271	0.0118765	0.00712589	0.0190024	0.0142518	0.0142518	0.00950119	0.0166271	0.00950119	0.023753	0.0118765	0.0166271	0.0855107	0.0855107	0.087886	0.0855107
29	Rhipicephalus_turanicus_(Croatia_Mljet)_KX757894	0.142518	0.123515	0.106888	0.104513	0.00475059	0.0190024	0.0166271	0.0190024	0.0213777	0.0166271	0.0190024	0.0213777	0.0261283	0.0261283	0.023753	0.0285036	0.0190024	0.023753	0.023753	0.0190024	0.0190024	0.0261283	0.023753	0.087886	0.087886	0.0902613	0.087886	0.0285036
30	Rhipicephalus_turanicus_(Croatia_Murter)_KX757891	0.140143	0.12114	0.106888	0.102138	0.0023753	0.0166271	0.0142518	0.0166271	0.0190024	0.0142518	0.0166271	0.0190024	0.023753	0.023753	0.0213777	0.0261283	0.0166271	0.0213777	0.0213777	0.0166271	0.0166271	0.023753	0.0213777	0.0855107	0.0855107	0.087886	0.0855107	0.0261283	0.0023753
31	Rhipicephalus_turanicus_(Iraq_Al-Wardia)_KM235718	0.137767	0.0926366	0.111639	0.104513	0.0855107	0.0902613	0.0902613	0.0926366	0.0902613	0.0902613	0.087886	0.0902613	0.0902613	0.0902613	0.087886	0.0973872	0.0926366	0.087886	0.087886	0.087886	0.0926366	0.0902613	0.087886	0.00712589	0.00712589	0.00950119	0.00712589	0.0855107	0.087886	0.0855107
32	Rhipicephalus_turanicus_(Israel)_KF251019	0.128266	0.087886	0.106888	0.0997625	0.0807601	0.0855107	0.0855107	0.087886	0.0855107	0.0855107	0.0831354	0.0855107	0.0855107	0.0855107	0.0831354	0.0926366	0.087886	0.0831354	0.0831354	0.0831354	0.0831354	0.0855107	0.0831354	0.00950119	0.00950119	0.00712589	0.00950119	0.0807601	0.0831354	0.0807601	0.0118765
33	Rhipicephalus_turanicus_(MontenegroTivat)_KX757884	0.137767	0.118765	0.11639	0.106888	0.0118765	0.0023753	0.00475059	0.0023753	0.00950119	0.00475059	0.0166271	0.00475059	0.0142518	0.0142518	0.00712589	0.0166271	0.0023753	0.0118765	0.00712589	0.0118765	0.00712589	0.0142518	0.00712589	0.0902613	0.0902613	0.0926366	0.0902613	0.0166271	0.0166271	0.0142518	0.0902613	0.0855107
34	Rhipicephalus_turanicus_(Turkey_Konya)_AF132841	0.15677	0.133017	0.135392	0.123515	0.0356295	0.0308789	0.0285036	0.0261283	0.0190024	0.0285036	0.0261283	0.0285036	0.023753	0.023753	0.0308789	0.0261283	0.0261283	0.0213777	0.0308789	0.0213777	0.0356295	0.023753	0.0308789	0.109264	0.109264	0.111639	0.109264	0.0261283	0.04038	0.0380048	0.109264	0.104513	0.0285036
35	Rhipicephalus_sanguineus_(France)_MH630346	0.128266	0.109264	0.0023753	0.0546318	0.109264	0.118765	0.118765	0.12114	0.118765	0.12114	0.118765	0.12114	0.11639	0.12114	0.11639	0.11639	0.12114	0.11639	0.11639	0.11639	0.114014	0.118765	0.11639	0.114014	0.114014	0.111639	0.114014	0.12114	0.109264	0.109264	0.114014	0.109264	0.118765	0.137767
36	Rhipicephalus_sanguineus_(France)_MH630347	0.128266	0.109264	0.0023753	0.0546318	0.109264	0.118765	0.118765	0.12114	0.118765	0.12114	0.118765	0.12114	0.11639	0.12114	0.11639	0.11639	0.12114	0.11639	0.11639	0.11639	0.114014	0.118765	0.11639	0.114014	0.114014	0.111639	0.114014	0.12114	0.109264	0.109264	0.114014	0.109264	0.118765	0.137767	0
37	Rhipicephalus_turanicus_(Turkmenistan)_KF145152	0.135392	0.111639	0.114014	0.104513	0.0261283	0.0356295	0.0285036	0.0308789	0.023753	0.0285036	0.0213777	0.0332542	0.0285036	0.0285036	0.0308789	0.0308789	0.0308789	0.0261283	0.0332542	0.0213777	0.0356295	0.0285036	0.0332542	0.0902613	0.0902613	0.0926366	0.0902613	0.0261283	0.0308789	0.0285036	0.0902613	0.0855107	0.0332542	0.0427553	0.11639	0.11639
38	Rhipicephalus_turanicus_(Turkmenistan)_KF145153	0.135392	0.109264	0.118765	0.104513	0.0308789	0.0356295	0.0332542	0.0308789	0.023753	0.0285036	0.0213777	0.0332542	0.0285036	0.0285036	0.0308789	0.0308789	0.0308789	0.0261283	0.0332542	0.0213777	0.0356295	0.0285036	0.0332542	0.0950119	0.0950119	0.0973872	0.0950119	0.0261283	0.0356295	0.0332542	0.0950119	0.0902613	0.0332542	0.0427553	0.12114	0.12114	0.00475059
39	Rhipicephalus_turanicus_(Greece)_KC243911	0.142518	0.11639	0.118765	0.109264	0.0190024	0.0142518	0.0118765	0.00950119	0.0023753	0.0118765	0.00950119	0.0118765	0.00712589	0.00712589	0.0142518	0.00950119	0.00950119	0.00475059	0.0142518	0.00475059	0.0190024	0.00712589	0.0142518	0.0926366	0.0926366	0.0950119	0.0926366	0.00950119	0.023753	0.0213777	0.0926366	0.087886	0.0118765	0.0213777	0.12114	0.12114	0.0261283	0.0261283
40	Rhipicephalus_turanicus_(Italy)_KC243902	0.140143	0.12114	0.106888	0.102138	0	0.0142518	0.0118765	0.0142518	0.0166271	0.0118765	0.0142518	0.0166271	0.0213777	0.0213777	0.0190024	0.023753	0.0142518	0.0190024	0.0190024	0.0142518	0.0142518	0.0213777	0.0190024	0.0855107	0.0855107	0.087886	0.0855107	0.023753	0.00475059	0.0023753	0.0855107	0.0807601	0.0118765	0.0356295	0.109264	0.109264	0.0261283	0.0308789	0.0190024
